# Supplementary material for: Highly efficient synthesis of arbutin esters catalyzed by whole cells ofCandida parapsilosis
Source: Royal Society of Chemistry journal article supplement (doi:10.1039/c8ra00595h), 2018-01-01
Supplement: c8ra00595h1.pdf [file c8ra00595h1.pdf]

## Highly efficient synthesis of arbutin esters catalyzed by whole cells of *Candida parapsilosis*

### All authors and their affiliations:

Dr. Xiaofeng Li, first author

School of Food Sciences and Engineering, South China University of Technology, Wushan Road 381, Guangzhou 510641, China

Tel: (+86)20-22236819; E-mail: xflibio@scut.edu.cn ; Fax: (+86)20-87112853

Haixia Xu,

School of Food Sciences and Engineering, South China University of Technology, Wushan Road 381, Guangzhou 510641, China

Tel: (+86)20-22236819 ; E-mail: 201520120593@mail.scut.edu.cn; Fax: (+86)20-87112853

\*Dr. Guanglei Zhao, corresponding authors

State Key Laboratory of Pulp and Paper Engineering, South China University of Technology, Guangzhou, Guangdong, 510641, China

Tel: (+86)20-87111770; E-mail: glzhao@scut.edu.cn(G.L.Zhao); Fax: (+86)20-87111770

Dr. Wu Hui

School of Food Sciences and Engineering, South China University of Technology, Wushan Road 381, Guangzhou 510641, China

Tel: (+86)20-87112373; E-mail: fehwu@scut.edu.cn; Fax: (+86)20-87112373

Dr. Yigang Yu

School of Food Sciences and Engineering, South China University of Technology, Wushan Road 381, Guangzhou 510641, China

Tel: (+86)20-22236819; E-mail: yuyigang@scut.edu.cn; Fax: (+86)20-87112853

Dr. Furao Lai,

School of Food Sciences and Engineering, South China University of Technology, Wushan Road 381, Guangzhou 510641, China

Tel: (+86)20-87112373; E-mail: felai@scut.edu.cn; Fax: (+86)20-87112373

\*\*Dr. Xinglong Xiao, corresponding authors

School of Food Sciences and Engineering, South China University of Technology, Wushan  
Road 381, Guangzhou 510640, China

Tel: (+86)20-22236819; E-mail: hxiao@unb.ca ; Fax: (+86)20-87112853

## HPLC results

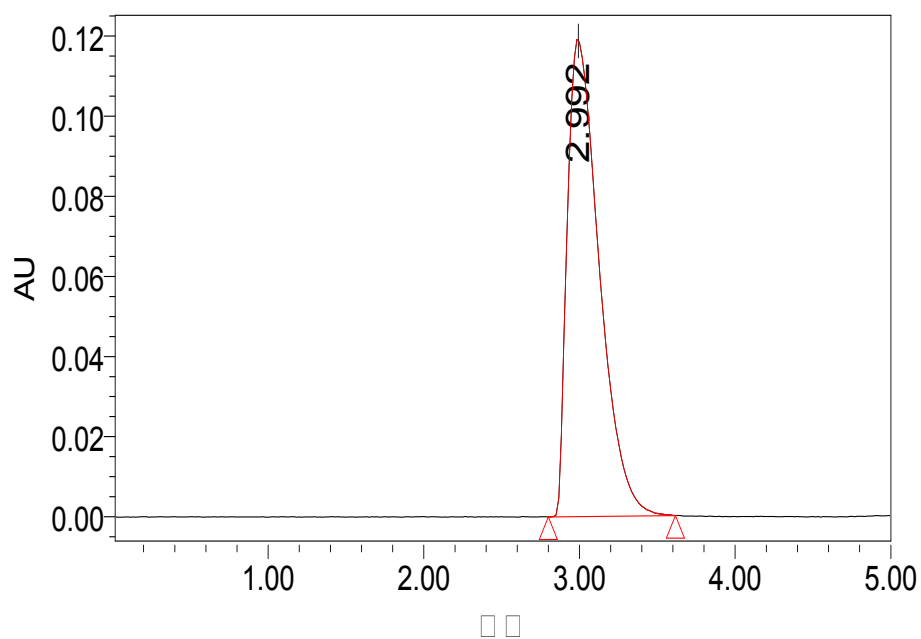

Fig. 1. Liquid chromatogram of arbutin before reaction.

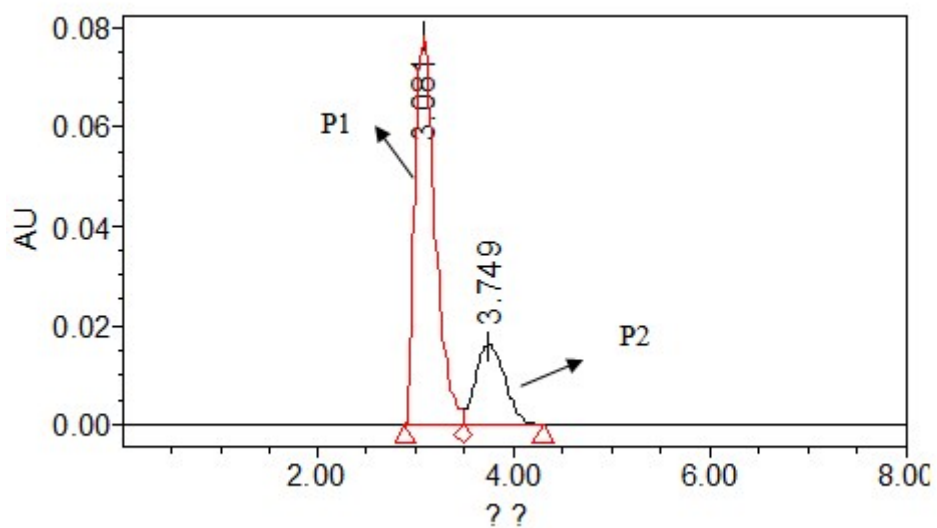

Fig. 2. Liquid chromatogram of the reaction at 1h.

P1: the peak of arbutin    P2: the peak of monoester

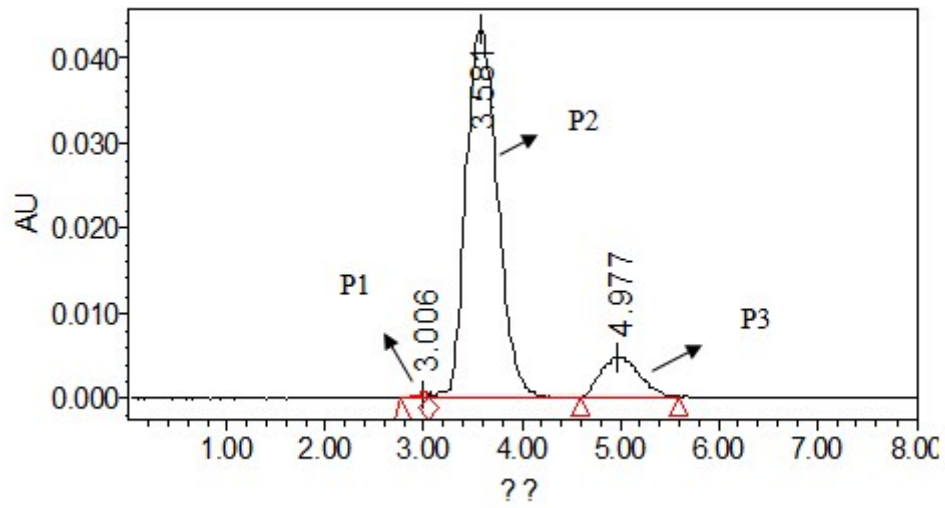

Fig. 3. Liquid chromatogram of the reaction at 24h.

P1: the peak of arbutin    P2: the peak of monoester    P3: the peak of diester
